# Supplementary material for: Nucleolar protein NOP2/NSUN1 suppresses HIV-1 transcription and promotes viral latency by competing with Tat for TAR binding and methylation
Source: PubMed Central journal article supplement (PMC7098636; doi:10.1371/journal.ppat.1008430), 2020-03-16

**Figure S2**

**A**

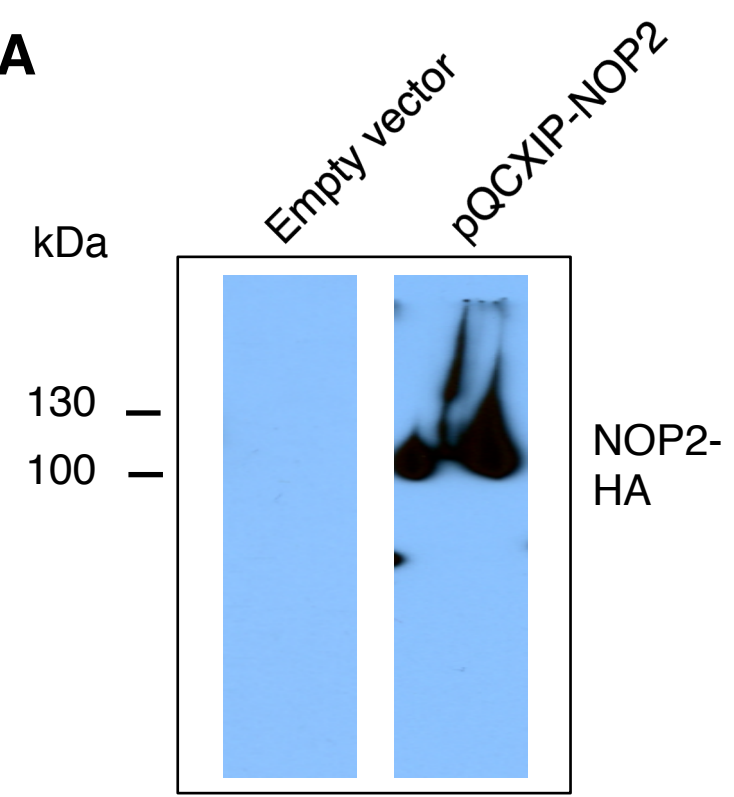

**B**

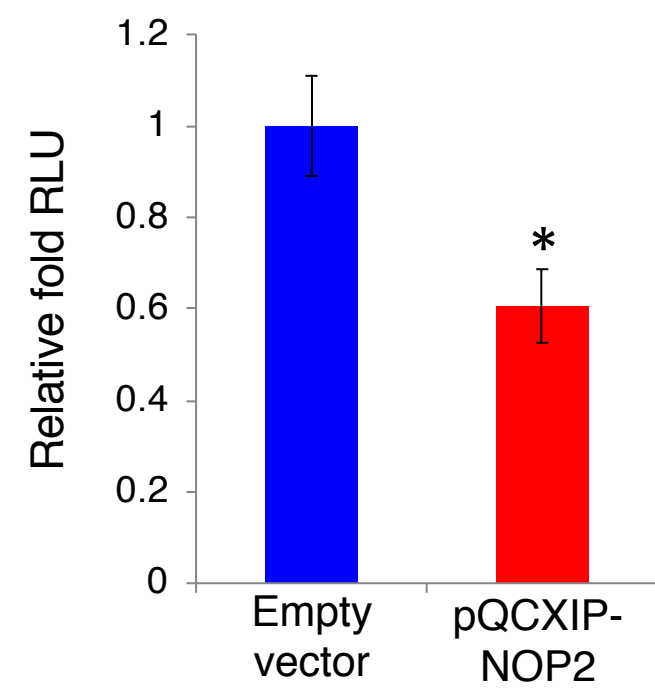

Supplement: ppat.1008430.s002.pdf [file ppat.1008430.s002.pdf]
